# Supplementary material
Source: publisher figshare collection journal article supplement (https://gsapubs.figshare.com/ndownloader/files/36561321)
Supplement: Supplementary file 1 [file 36561321]

## Sheet: Table S8
Table S8 Compiled age data of magmatic-hydrothermal activities in the Koktokay No. 3 pegmatite
Zone	I	II	III	IV	V	VI	VII	VIII	IX	3A sill	3B sill	Metagabbro	Granite vein	Ball-like granite
Zircon U-Pb dating	220 ± 9 (Wang et al., 2007)	211.9±3.2Ma (Chen et al., 2018) 186.5±2.0Ma (Wang et al., 2007)		214.9±2.1Ma (Chen et al., 2018)	212.0±4.1Ma (Chen et al., 2018) 210.7±6.3 Ma 186±2 Ma (Zhou et al., 2015)	198 ± 7 Ma (Wang et al., 2007) 187.4±2.7 Ma (Zhou et al., 2015)	193.3 ± 6.4 Ma 214 ± 2 Ma (Zhou et al., 2015)	198.5 ± 4.2 Ma 172 ± 3 Ma (Zhou et al., 2015)		208.1 ± 0.8 Ma (Ren et al., 2011)	213 ± 2 Ma (Wang et al., 2007)	408 ± 6 Ma (Wang et al., 2006) 409 ± 5 Ma (Cai et al., 2012b)	409 ± 7 Ma (Wang et al., 2006)
Molybdenite Re-Os dating	209.4±1.3 (Liu et al., 2014)
Clumbite U-Pb dating	218±2 Ma (Che et al., 2015)													182.3±1.0 (This study)
Apatite U-Pb dating														184.9±4.2 (This study)
Muscovite Ar-Ar dating		179.7±1.1Ma (Zhou et al., 2015)		182.1±1.0Ma (Zhou et al., 2015)		181.8±1.1Ma (Zhou et al., 2015)
Evolution Stage	Magmatic stage				Magmatic-hydrothemral stage			Hydrothermal stage
Temperature	900-600 ℃				650-500 ℃			530-450 ℃
The temperatures of each zone were obtained from studies of fluid-melt inclusions in minerals from the No. 3 pegmatite (Zhu et al., 2000)
